# Supplementary material for: Redox Performance and Optimization of the Chemical Composition of Lanthanum–Strontium–Manganese-Based Perovskite Oxide for Two-Step Thermochemical CO2 Splitting
Source: MDPI journal article supplement (doi:10.3390/pr11092717), 2023-09-11
Supplement: s1 [file s1]

## Supplementary Materials:

Redox performances and optimizations of chemical composition of lanthanum-strontium-manganese-based perovskite oxide for two-step thermochemical CO<sub>2</sub> splitting

Hiroki Sawaguri <sup>1</sup>, Daichi Yasuhara <sup>2</sup> and Nobuyuki Gokon <sup>3,\*</sup>

<sup>1</sup> Graduate School of Science and Technology, Niigata University;  
f21k004a@mail.cc.niigata-u.ac.jp

<sup>2</sup> Graduate School of Science and Technology, Niigata University;  
F22B065J@mail.cc.niigata-u.ac.jp

<sup>3</sup> Faculty of Engineering, Niigata University

\* Correspondence:

ngokon@eng.niigata-u.ac.jp;

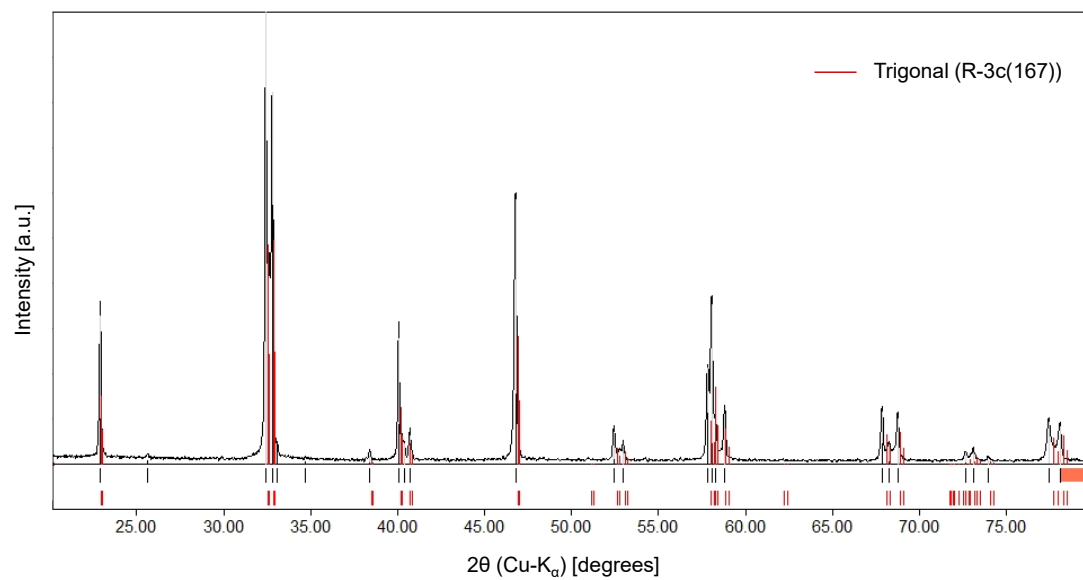

Figure S1. Powder XRD pattern of the as-prepared sample ( $x = 0$ ,  $\text{La}_{1-x}\text{Sr}_x\text{Mn}_{0.8}\text{Ni}_{0.2}\text{O}_3$ ).

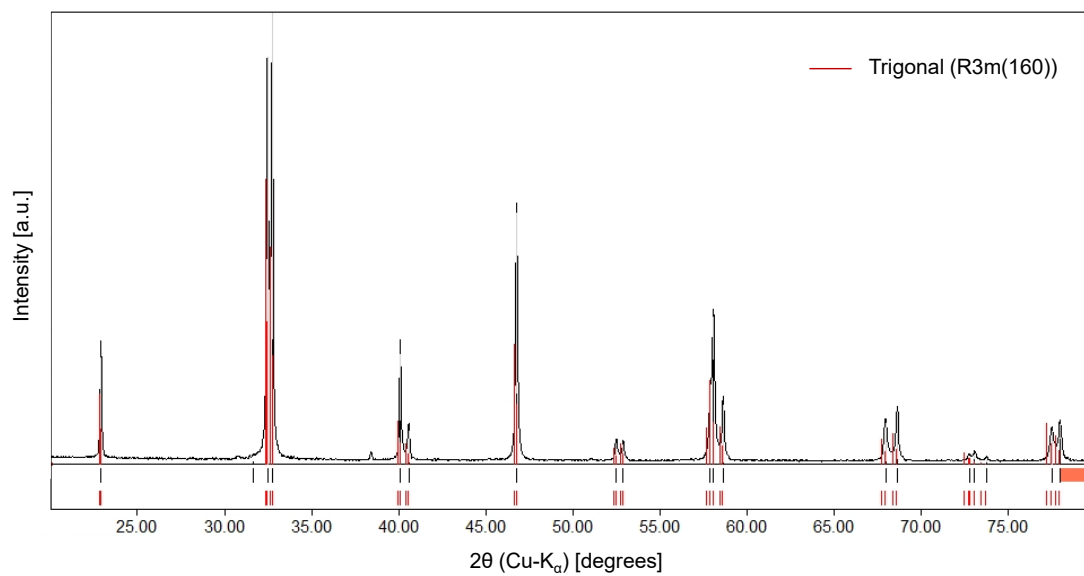

Figure S2. Powder XRD pattern of the as-prepared sample ( $x = 0.2$ ,  $\text{La}_{1-x}\text{Sr}_x\text{Mn}_{0.8}\text{Ni}_{0.2}\text{O}_3$ ).

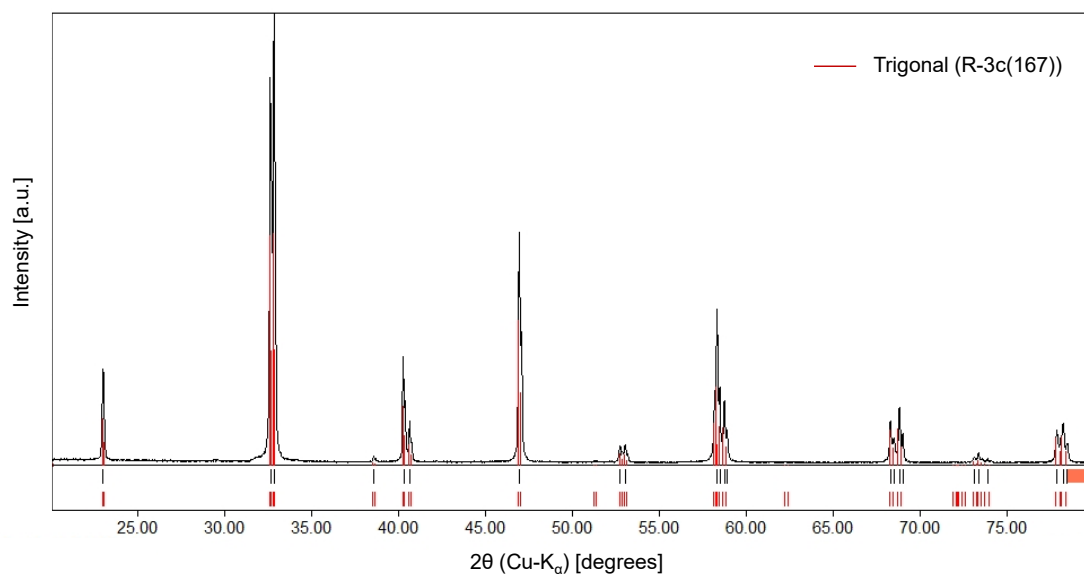

Figure S3. Powder XRD pattern of the as-prepared sample ( $x = 0.3$ ,  $\text{La}_{1-x}\text{Sr}_x\text{Mn}_{0.8}\text{Ni}_{0.2}\text{O}_3$ ).

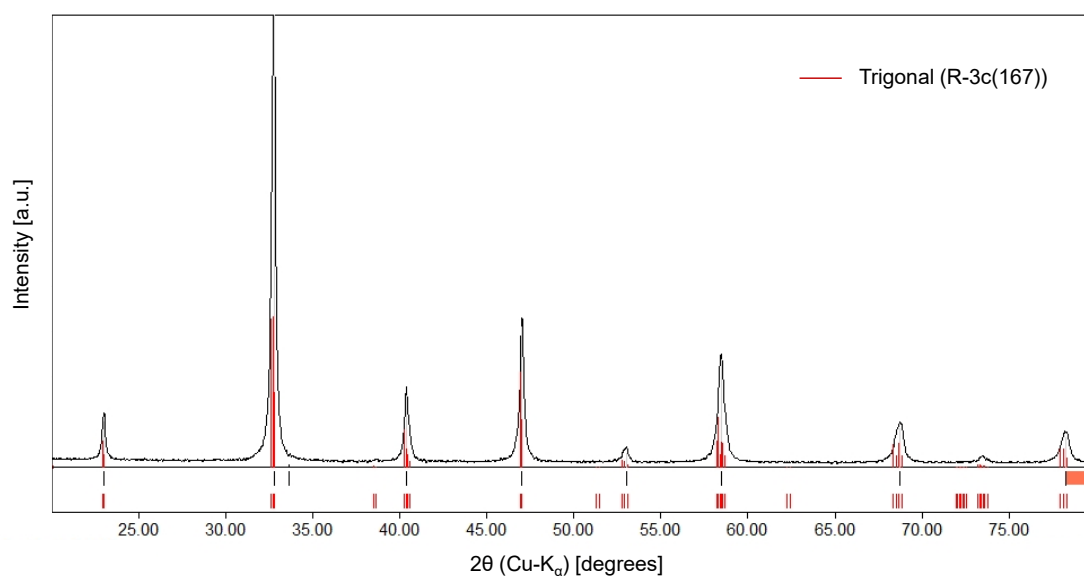

Figure S4. Powder XRD pattern of the as-prepared sample ( $x = 0.4$ ,  $\text{La}_{1-x}\text{Sr}_x\text{Mn}_{0.8}\text{Ni}_{0.2}\text{O}_3$ ).

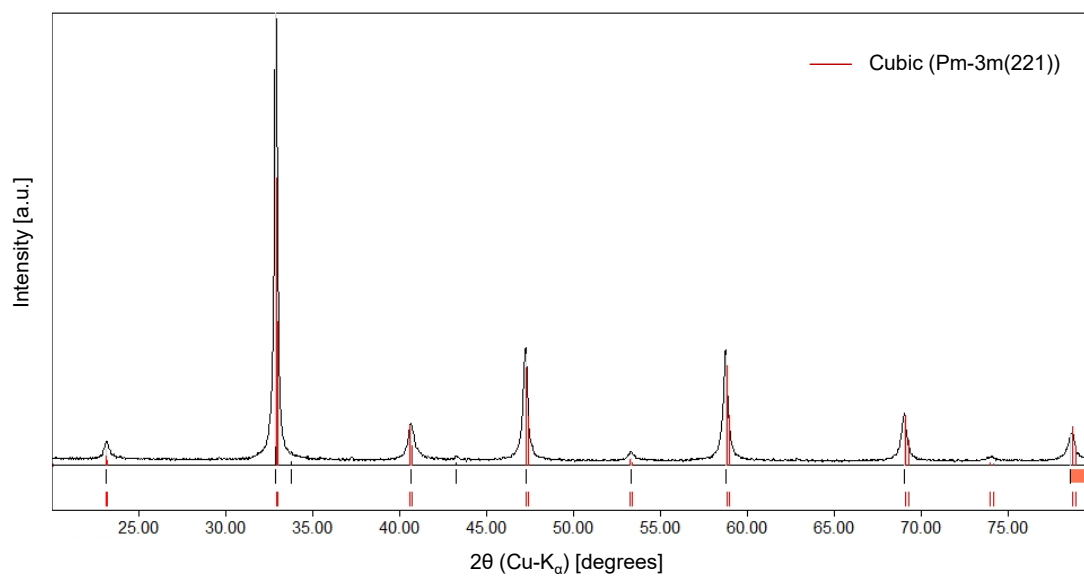

Figure S5. Powder XRD pattern of the as-prepared sample ( $x = 0.6$ ,  $\text{La}_{1-x}\text{Sr}_x\text{Mn}_{0.8}\text{Ni}_{0.2}\text{O}_3$ ).

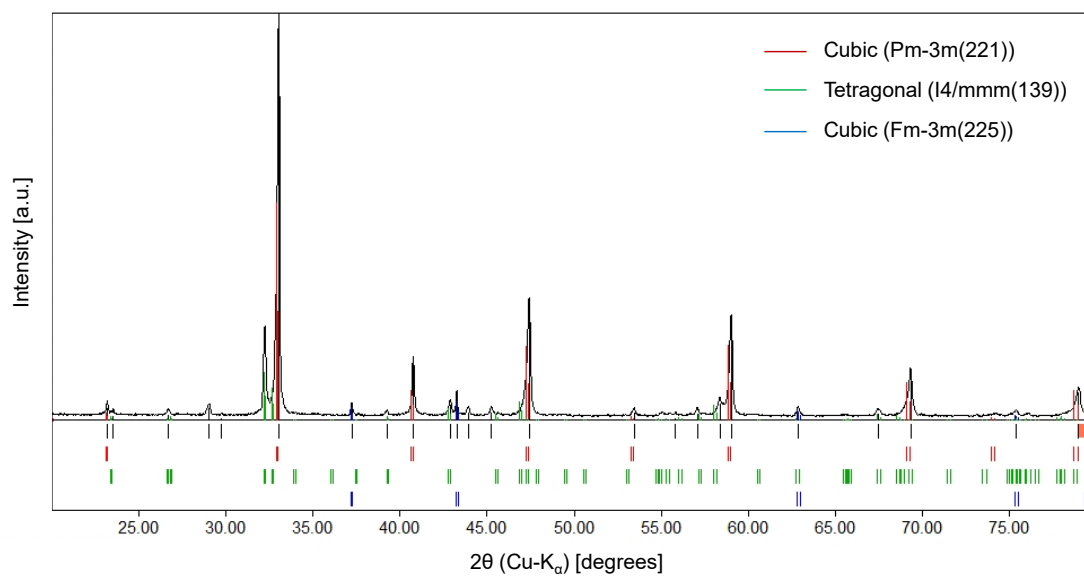

Figure S6. Powder XRD pattern of the as-prepared sample ( $x = 0.8$ ,  $\text{La}_{1-x}\text{Sr}_x\text{Mn}_{0.8}\text{Ni}_{0.2}\text{O}_3$ ).

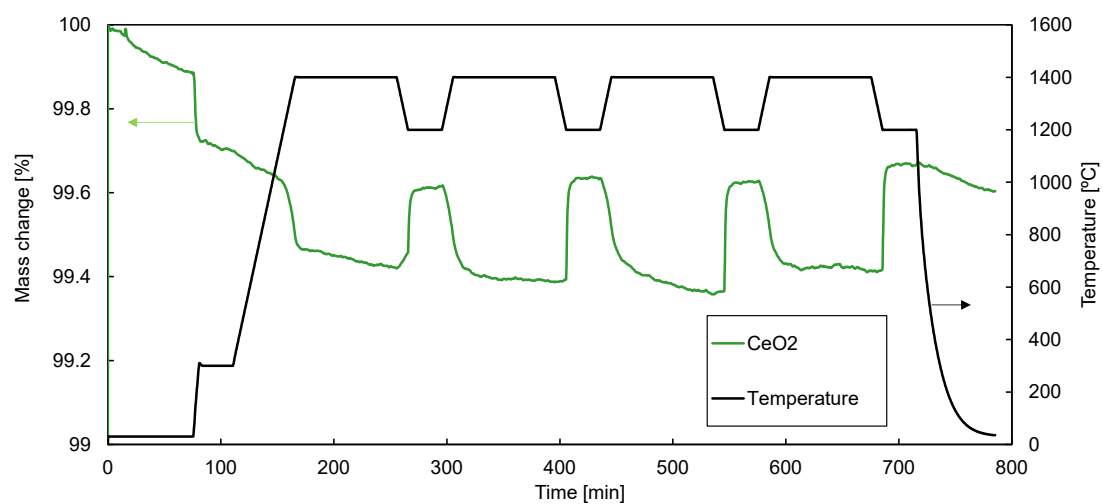

Figure S7. Thermochemical cycling test of the ceria sample ( $\text{CeO}_2$ ).



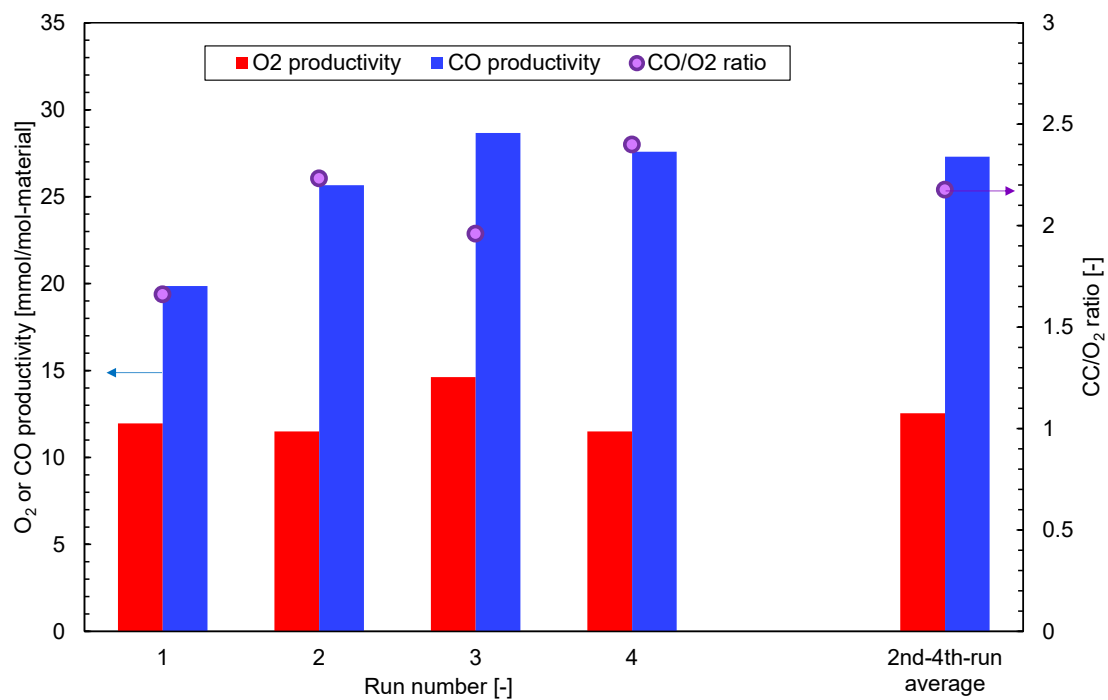

Figure S8. O<sub>2</sub> and CO productivities, and CO/O<sub>2</sub> ratio for thermochemical cycling using the ceria sample (CeO<sub>2</sub>).

Table S1. Comparison of O<sub>2</sub> productivity, average CO productivity, cycle-averaged CO production rate, and reaction conditions of LSMCo0.35, LSMNi0.20, LSMMg0.125, CeO<sub>2</sub>, and LSM perovskites reported in the literature.

| Materials                                                                                                | Reaction equipment | Run number [-] | TR temp. [°C] | average O <sub>2</sub> productivity [ $\mu$ mol /g] | CS temp. [°C] | average CO productivity [ $\mu$ mol /g] | CS duration [min] | CO <sub>2</sub> conc. [-] | total flow rate at CS step [mL/min] | total feeding amount of CO <sub>2</sub> [ $\mu$ mol] | Cycle-averaged CO production rate [ $\mu$ mol/(min·g)] | Reference     |
|----------------------------------------------------------------------------------------------------------|--------------------|----------------|---------------|-----------------------------------------------------|---------------|-----------------------------------------|-------------------|---------------------------|-------------------------------------|------------------------------------------------------|--------------------------------------------------------|---------------|
| La <sub>0.7</sub> Sr <sub>0.3</sub> Mn <sub>0.65</sub> Co <sub>0.35</sub> O <sub>3</sub> (LSMCo0.35)     | TGA                | 2              | 1400          | 90                                                  | 1200          | 533                                     | 30                | 0.500                     | 100                                 | $6.05 \times 10^4$                                   | 17.8                                                   | Present study |
| La <sub>0.7</sub> Sr <sub>0.3</sub> Mn <sub>0.8</sub> Ni <sub>0.3</sub> O <sub>3</sub> (LSMNi0.20)       | TGA                | 2              | 1400          | 90                                                  | 1200          | 456                                     | 30                | 0.500                     | 100                                 | $6.05 \times 10^4$                                   | 15.2                                                   | Present study |
| La <sub>0.7</sub> Sr <sub>0.3</sub> Mn <sub>0.875</sub> Mg <sub>0.125</sub> O <sub>3</sub> (LSMMg 0.125) | TGA                | 2              | 1400          | 90                                                  | 1200          | 387                                     | 30                | 0.500                     | 100                                 | $6.05 \times 10^4$                                   | 12.9                                                   | Present study |
| CeO <sub>2</sub>                                                                                         | TGA                | 2              | 1400          | 90                                                  | 1200          | 158                                     | 30                | 0.500                     | 100                                 | $6.05 \times 10^4$                                   | 5.27                                                   | Present study |
| La <sub>0.7</sub> Sr <sub>0.3</sub> Mn <sub>0.9</sub> Mg <sub>0.1</sub> O <sub>3</sub>                   | TGA                | 3              | 1400          | 90                                                  | 1200          | 354                                     | 30                | 0.500                     | 100                                 | $6.05 \times 10^4$                                   | 11.8                                                   | [53]          |
| La <sub>0.7</sub> Sr <sub>0.3</sub> Mn <sub>0.9</sub> Ni <sub>0.1</sub> O <sub>3</sub>                   | TGA                | 3              | 1400          | 90                                                  | 1200          | 351                                     | 30                | 0.500                     | 100                                 | $6.05 \times 10^4$                                   | 11.7                                                   | [53]          |
| La <sub>0.7</sub> Sr <sub>0.3</sub> Mn <sub>0.9</sub> Co <sub>0.1</sub> O <sub>3</sub>                   | TGA                | 3              | 1400          | 90                                                  | 1200          | 347                                     | 30                | 0.500                     | 100                                 | $6.05 \times 10^4$                                   | 11.6                                                   | [53]          |
| La <sub>0.7</sub> Sr <sub>0.3</sub> MnO <sub>3</sub>                                                     | TGA                | 3              | 1400          | 90                                                  | 1200          | 248                                     | 30                | 0.500                     | 100                                 | $6.05 \times 10^4$                                   | 8.27                                                   | [53]          |
| La <sub>0.5</sub> Sr <sub>0.5</sub> Mn <sub>0.95</sub> Sc <sub>0.05</sub> O <sub>3</sub>                 | TGA                | 3              | 1400          | 45                                                  | 1100          | 506                                     | 45                | 0.400                     | 40                                  | $6.05 \times 10^4$                                   | 11.2                                                   | [39]          |
| La <sub>0.5</sub> Sr <sub>0.5</sub>                                                                      | TGA                | 3              | 1400          | 45                                                  | 1100          | 460                                     | 45                | 0.400                     | 40                                  | $2.90 \times$                                        | 10.2                                                   | [39]          |

|                                                                                             |                                    |   |      |    |      |     |    |       |     |                    |      |      |
|---------------------------------------------------------------------------------------------|------------------------------------|---|------|----|------|-----|----|-------|-----|--------------------|------|------|
| Mn <sub>0.75</sub> Ga <sub>0.25</sub> O <sub>3</sub>                                        |                                    |   |      |    |      |     |    |       |     | 10 <sup>4</sup>    |      |      |
| La <sub>0.65</sub> Sr <sub>0.35</sub><br>MnO <sub>3</sub>                                   | TGA                                | 2 | 1400 | 45 | 1050 | 194 | 60 | 0.500 | 20  | $2.42 \times 10^4$ | 3.23 | [29] |
| La <sub>0.5</sub> Sr <sub>0.5</sub> MnO <sub>3</sub>                                        | TGA                                | 2 | 1400 | 45 | 1050 | 242 | 60 | 0.500 | 20  | $2.42 \times 10^4$ | 4.03 | [29] |
| La <sub>0.6</sub> Sr <sub>0.4</sub><br>Mn <sub>0.5</sub> Co <sub>0.5</sub> O <sub>3</sub>   | TGA                                | 2 | 1300 | 45 | 1050 | 139 | 45 | 0.500 | 20  | $1.81 \times 10^4$ | 3.09 | [29] |
| LaMn <sub>0.5</sub><br>Ni <sub>0.5</sub> O <sub>3</sub>                                     | TGA                                | 2 | 1400 | 45 | 1050 | 105 | 45 | 0.500 | 20  | $1.81 \times 10^4$ | 2.33 | [29] |
| La <sub>0.7</sub> Sr <sub>0.3</sub><br>Mn <sub>0.9</sub> Cr <sub>0.1</sub> O <sub>3</sub>   | fixed bed                          | 3 | 1350 | 30 | 1200 | 215 | 50 | 0.840 | 75  | $1.27 \times 10^5$ | 4.30 | [47] |
| LaCo <sub>0.7</sub><br>Zr <sub>0.3</sub> O <sub>3</sub>                                     | TGA                                | 3 | 1300 | 20 | 800  | 224 | 60 | 0.500 | 80  | $9.68 \times 10^4$ | 3.73 | [41] |
| La <sub>0.7</sub> Sr <sub>0.3</sub> MnO <sub>3</sub>                                        | TGA                                | 9 | 1400 | 60 | 1000 | 209 | 30 | 0.500 | 100 | $6.05 \times 10^4$ | 6.97 | [33] |
| La <sub>0.6</sub> Sr <sub>0.4</sub> MnO <sub>3</sub>                                        | TGA                                | 9 | 1400 | 60 | 1000 | 295 | 30 | 0.500 | 100 | $6.05 \times 10^4$ | 9.83 | [33] |
| La <sub>0.3</sub> Sr <sub>0.7</sub> MnO <sub>3</sub>                                        | TGA                                | 9 | 1400 | 60 | 1000 | 342 | 30 | 0.500 | 100 | $6.05 \times 10^4$ | 11.4 | [33] |
| La <sub>0.6</sub> Sr <sub>0.4</sub> FeO <sub>3</sub>                                        | TGA                                | 1 | 1350 | 20 | 1000 | 251 | 50 | 1.000 | 100 | $2.02 \times 10^4$ | 5.02 | [45] |
| La <sub>0.6</sub> Sr <sub>0.4</sub> MnO <sub>3</sub>                                        | TGA                                | 1 | 1350 | 20 | 1000 | 469 | 50 | 1.000 | 100 | $2.02 \times 10^4$ | 9.38 | [45] |
| La <sub>0.6</sub> Sr <sub>0.4</sub><br>Mn <sub>0.8</sub> Fe <sub>0.2</sub> O <sub>3</sub>   | TGA                                | 1 | 1350 | 20 | 1000 | 330 | 50 | 1.000 | 100 | $2.02 \times 10^4$ | 6.60 | [45] |
| La <sub>0.5</sub> Sr <sub>0.5</sub><br>Mn <sub>0.83</sub> Mg <sub>0.17</sub> O <sub>3</sub> | TGA                                | 2 | 1400 | 45 | 1050 | 208 | 60 | 0.500 | 20  | $2.42 \times 10^4$ | 3.47 | [31] |
| La <sub>0.5</sub> Sr <sub>0.5</sub><br>Mn <sub>0.75</sub> Al <sub>0.25</sub> O <sub>3</sub> | TGA                                | 2 | 1400 | 45 | 1050 | 221 | 60 | 0.500 | 20  | $2.42 \times 10^4$ | 3.68 | [31] |
| La <sub>0.5</sub> Sr <sub>0.5</sub><br>Mn <sub>0.9</sub> Mg <sub>0.1</sub> O <sub>3</sub>   | TGA                                | 2 | 1400 | 45 | 1050 | 215 | 60 | 0.500 | 20  | $2.42 \times 10^4$ | 3.58 | [32] |
| La <sub>0.6</sub> Sr <sub>0.4</sub><br>Mn <sub>0.6</sub> Al <sub>0.4</sub> O <sub>3</sub>   | stagn-<br>ation<br>flow<br>reactor | 1 | 1350 | -  | 1000 | 294 | -  | -     | -   | -                  | -    | [36] |

|                                                                                                                                                       |     |   |      |    |      |     |    |       |    |                                             |      |      |
|-------------------------------------------------------------------------------------------------------------------------------------------------------|-----|---|------|----|------|-----|----|-------|----|---------------------------------------------|------|------|
| <div>(La<sub>0.8</sub>Sr<sub>0.2</sub>)</div> <div>(Mn<sub>0.2</sub>Fe<sub>0.2</sub></div> <div>Co<sub>0.4</sub>Al<sub>0.2</sub>)O<sub>3</sub> </div> | TGA | 2 | 1400 | 45 | 1050 | 85  | 60 | 0.500 | 20 | <div>2.42 ×</div> <div>10<sup>4</sup></div> | 1.42 | [67] |
| <div>(La<sub>0.5</sub>Sr<sub>0.5</sub>)</div> <div>Mn<sub>0.9</sub>Mg<sub>0.1</sub>O<sub>3</sub> </div>                                               | TGA | 2 | 1400 | 45 | 1050 | 248 | 60 | 0.500 | 20 | <div>2.42 ×</div> <div>10<sup>4</sup></div> | 4.13 | [67] |
